# Supplementary material for: Metabolic and Transcriptional Analysis Reveals Flavonoid Involvement in the Drought Stress Response of Mulberry Leaves
Source: Preprints.org preprint supplement (doi:10.20944/preprints202405.1734.v1), 2024-05-27
Supplement: Supplementary file 1 [file supplementary]

**Supporting Information for**

**Metabolic and Transcriptional Analysis Reveals Flavonoid Involvement in the Drought Stress Response of Mulberry Leaves**

Guo Chen#1, Dong Li#1, Pei Yao1, Fengyao Chen1, Jianglian Yuan1, Bi Ma1, Zhen Yang1, Biyue Ding2 and Ningjia He*1

1State Key Laboratory of Resource Insects, Institute of Sericulture and Systems Biology, Southwest University, Chongqing 400715, China

2Key Laboratory of Agricultural Biosafety and Green Production of Upper Yangtze River (Ministry of Education), Academy of Agricultural Sciences, Southwest University, Chongqing 400715, China

Guo Chen: 542523966@qq.com

Dong Li: lidong203@swu.edu.cn

Pei Yao: 513805691@qq.com

Fengyao Chen: 912688140@qq.com

Jianglian Yuan: yuanjiangl@swu.edu.cn

Bi Ma: mbzls@swu.edu.cn

Zhen Yang: yangzhen1246305364@163.com

Biyue Ding: dingbiyue302@swu.edu.cn

Ningjia He: hejia@swu.edu.cn

#These authors contributed equally to this work

*Corresponding author: Ningjia He, State Key Laboratory of Resource Insects, Institute of Sericulture and Systems Biology, Southwest University, Chongqing 400715, China; Tel: +86-023-68250797; Fax: +86-023-68251128; E-mail: hejia@swu.edu.cn.

This file includes:

Figure S1-3, Table S1, Table S4, and Table S5

**Supplementary Materials:**

**Figure S1.** Metabolic and transcriptional analysis of *M. Pendula* leaves under drought stress.

**Figure S2.** Non-rooted molecular phylogenetic tree of flavonoid-related UDP-glycosyltransferase.

**Figure S3.** Bioinformatic analysis of *MaFLS1*.

**Table S1**. List of primer sequences used in this study.

**Table S2.** Checklist of flavonoids measured in this study and recommendations for LC-MS/MS. Table is on a separate sheet.

**Table S3.** Metabolic profiling of flavonoids in *M. Pendula* leaves under drought stress. Table is on a separate sheet.

**Table S4.** Statistical results of RNA-seq assembly data.

**Table S5.** Details of significantly changed genes involved in flavonoid [biosynthesis](https://fanyi.so.com/?src=onebox#biosynthesis) in this study.


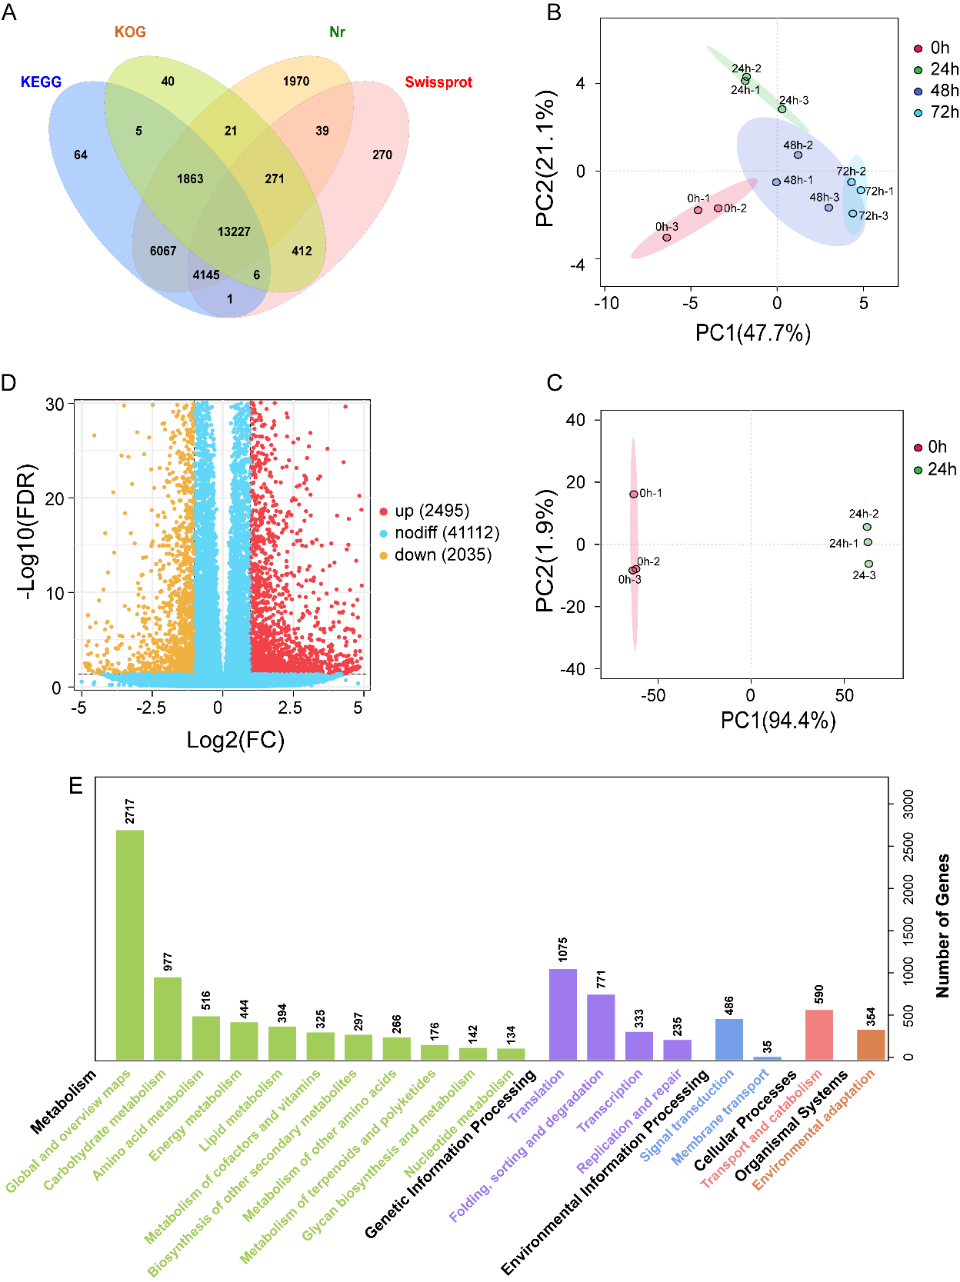


**Figure S1.** Metabolic and transcriptional analysis of *M. Pendula* leaves under drought stress. (**A**) Principal component analysis (PCA) of the metabolome. (**B**) PCA of the transcriptome. (**C**) Volcano plot displaying differentially expressed genes (DEGs) identified through transcriptome analysis. (**D**) Venn Diagram showing annotation genes across four databases. (**E**) KEGG pathways of DEGs in mulberry leaves under drought conditions.
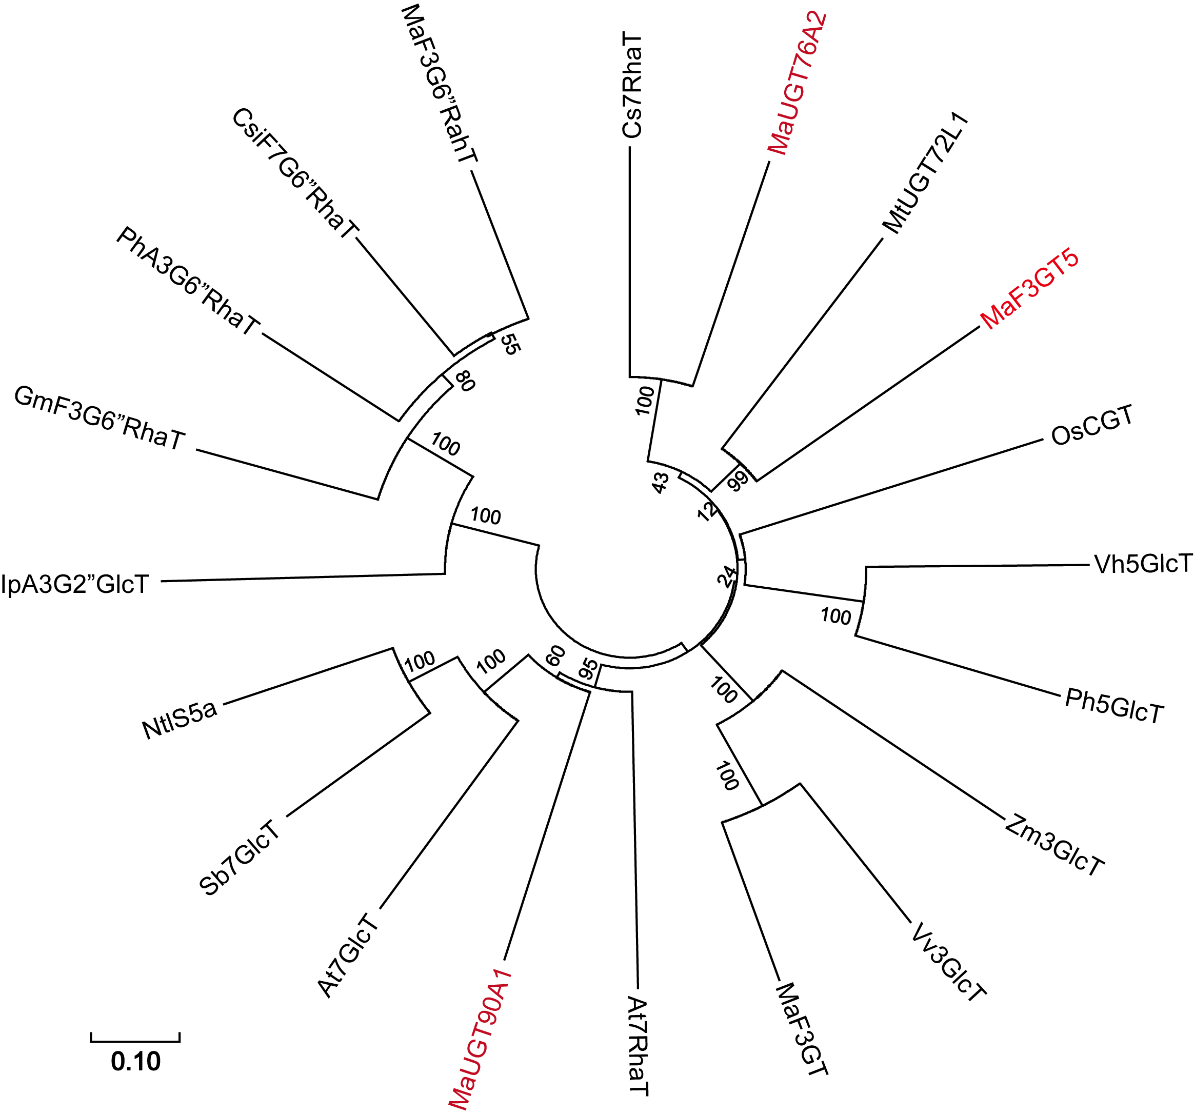


**Figure S2.** Non-rooted molecular phylogenetic tree of flavonoid related UDP-glycosyltransferase. The three candidate *MaUGTs* genes analyzed in this study are shown in red color. The GenBank accession numbers for the sequences are shown in parentheses: *Zm3GlcT* (X13501), *Vv3GlcT* (AF000371), *Ph5GlcT* (AB027455), *Vh5GlcT* (AB013598), *At7GlcT* (NM_129234), *Sb7GlcT* (AB031274), *NtIS5* (AF346431), *At7RhaT* (NM_100480), *MtUGT72L1* (EU434684), *OsCGT* (FM179712), *IpA3G2**˝GlcT* (AB192315), *PhA3G6˝RhaT* (Z25802), *GmF3G6˝RhaT* (NP_001275524), *CsiF7G6˝RhaT* (DQ119035), and *MaF3G6˝RhaT*（KT324624).


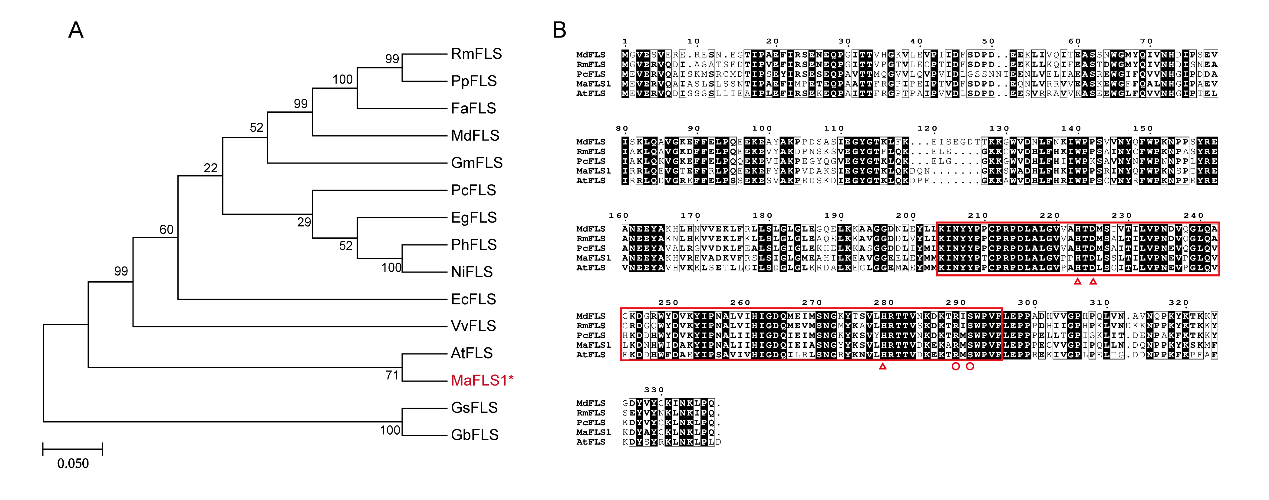


**Figure S3.** Bioinformatic analysis of *MaFLS1*. (**A**) Phylogenetic analysis of flavonol synthase (FLS). The phylogenetic tree was constructed using the MEGA7 software with a neighbor-joining method. Sequence data from this article can be found in the NCBI database under the following accession numbers: *VcFLS* (AKJ87100), *EcFLS* (ALP48589), *PcFLS* (AY230249), *EgFLS* (AY230249), *MdFLS* (AAD26261), *PhFLS* (Q07512), *FaFLS* (AAZ78661), *RmFLS* (AJP36706), *GmFLS* (NP001237419), *GsFLS* (NP001237419), *AtFLS* (AED91333), *PpFLS* (AJO70134), *GbFLS* (GQ994432), *NiFLS* (AB078512), and *MaFLS1* (XM_010098126). (**B**) Alignment of the amino acid sequences of the MaFLS1 and other FLS proteins. The typical of conserved 2-oxoglutarate-Fe (II) oxygenase domain is presented in the red box. The Fe2+-binding sites and oxoglutarate binding sites are indicated by red triangles and red ellipses, respectively.

**Table S1**. List of primer sequences used in this study.

| Gategory | Gene | Primer sequences | | |
| --- | --- | --- | --- | --- |
| Forward (5' to 3') | Reverse (3' to 5') |
| Sequencing | *MaFLS1* | ATGGAGGTTGAGAGAGTTCAAG | TCACTGGG GAAGCTTGTTGAG |
| *MaF3GT5* | ATGGGCCACCTAGTTCCGAT | TCAGCCAGTGCT TTCTTTTAAGCT |
| *MaUGT76A2* | ATGCCGGACGGCTTATCC | TCATGCCAAGAAACCAAATTGGTC |
| *MaUGT90A1* | ATGGAATCGGCTATCGAGCC | TTAATAATTACTCGCATGATCTACT |
| qRT-PCR | *MaPAL1* | CCGGACCGACTTCTTCGAGC | GAATTCGGGCATCCCGAGCA |
| *MaPAL2* | GCAATGGAACAGAATCATGTCACAC | TCTAATGCCTGAGTAGCCTTGGAG |
| *MaPAL3* | TCACCACCGGCTTTGGTTCC | CCGGAGGCGGTTATGGTTCC |
| *MaC4H* | AACCTCCCTTGTAGCTCGTCCTG | CCATACCAGCAGTACCACCAATTCC |
| *Ma4CL1* | CCGAAGGGGGTGATGCTGAC | ATCACGATCGGCGGCACAAT |
| *Ma4CL2* | CATCTCGGAGCCGTCACCAC | TCGTGCCCGAAGAATACGGC |
| *MaCHS1* | TCACACCGATCGGCATCAGC | CCTGCTTCAGCCCCAGCTTT |
| *MaCHS2* | GGCAACCTCCGTCCAAGAAATC | TTGTGCTCGCTGTTGGTGATTC |
| *MaCHI* | GAGATAGCCACGTTCCCGCC | TCCACTTACCGGCAAGCCAC |
| *MaFLS1* | CCTCCCTCTCGCATCAACTACC | AACACCTTATCCGCCACCTCTC |
| *MaFLS2* | TGTCTTGGGCGGTGTTTTGTG | ACTTTGGCGGGTTTGTCTTGTC |
| *MaF3H* | ATCGCGGTGACGGAGGAGTA | GCGCTTCAGGCCAAGAGTGA |
| *MaF3'H* | CGTAATCGGGAACCTGCCCC | TGTGCTTGGCTCCGGAGTTG |
| *MaF3GT* | CATCGTCCGTCGCCTAGCTG | GAACAGCTCGATGCGCTCCT |
| *MaF3GT5* | CTGCCACGTCATCGACCTCC | TCCTCGGCCAGACACAGACA |
| *MaUGT76A2* | TGGAATTGGAGGAGTTGGAGAGAG | AGACGAACCACCTTCCCTTGTAG |
| *MaUGT90A1* | CACTCCTTCGCCCGATCCAC | GCCCATAGCGGATTGCGAGT |
| *MaF3G6''RT* | TAGTCCACTCCGGGTGGGTG | ACCTCCACCCCAGCCTTCAT |

**Table S4.** Statistical results of RNA-seq assembly data.

| Genes number | GC percentage | N50 number | N50 length | Max length | Min length | Average length | Total assembled bases |
| --- | --- | --- | --- | --- | --- | --- | --- |
|
| 45642 | 40.4454 | 7996 | 2292 | 16569 | 201 | 1234 | 56354744 |

**Table S5.** Details of significantly changed genes involved in flavonoid [biosynthesis](https://fanyi.so.com/?src=onebox#biosynthesis) in this study.

| Gene ID | FPKMa | | Symbol | Putative annotationb |
| --- | --- | --- | --- | --- |
| C | D |
| Unigene0023038 | 10.82 | 25.15 | *PAL1* | Phenylalanine ammonia lyase |
| Unigene0039394 | 101.63 | 235.33 | *PAL2* | Phenylalanine ammonium lyase |
| Unigene0022114 | 3.8 | 6.83 | *PAL3* | Phenylalanine ammonia lyase |
| Unigene0039210 | 18.87 | 30.42 | *4CL1* | 4-coumarate--CoA ligase 1 |
| Unigene0020203 | 4.97 | 7.23 | *4CL2* | 4-coumarate--CoA ligase 1 |
| Unigene0042667 | 20.98 | 164.28 | *CHS1* | Chalcone synthase |
| Unigene0042666 | 2.25 | 4.65 | *CHS2* | Chalcone synthase |
| Unigene0008170 | 1.25 | 0.41 | *CHS3* | Chalcone synthase |
| Unigene0029681 | 49.98 | 85.59 | *F3H* | Flavone 3-hydroxylase |
| Unigene0046320 | 47.38 | 114.49 | *F3'H1* | Flavone 3'-hydroxylase |
| Unigene0046319 | 5.28 | 16.23 | *F3'H2* | Flavone 3'-hydroxylase |
| Unigene0000347 | 31.78 | 99.27 | *FLS1* | Flavonol synthase/flavanone 3-hydroxylase |
| Unigene0014572 | 2.41 | 0.09 | *FLS2* | Flavonol synthase/flavanone 3-hydroxylase |
| Unigene0042252 | 11.02 | 5.49 | *FLS3* | Flavonol synthase/flavanone 3-hydroxylase |
| Unigene0046274 | 15.85 | 61.33 | *F3GT* | Anthocyanidin 3-O-glucosyltransferase |
| Unigene0033543 | 7.26 | 71.72 | *F3GT5* | Anthocyanidin 3-O-glucosyltransferase 5 |
| Unigene0015859 | 1.11 | 4.98 | *UGT76A2* | UDP-glucose glucosyltransferase 76A2 |
| Unigene0038284 | 5.5 | 13.72 | *UGT90A1* | UDP-glucose glucosyltransferase 90A1 |

aRepresents average of three replicates of normalized FPKM (reads per kb per million reads) values.

bPutative annotations according to BlastX queries against NCBI non-redundant (nr) protein database.
